# Supplementary material for: Infrared Fast-Maneuvering Target Tracking Based on Robust Exact Differentiator with Improved Particle Filter
Source: Hindawi journal article supplement (doi:10.1155/2022/6406672), 2022-10-21
Supplement: f1 [file 6406672.f1.zip]

Archive with 203 entries (200 files):
- Supplementary files/
- Supplementary files/443.bmp
- __MACOSX/
- __MACOSX/Supplementary files/
- __MACOSX/Supplementary files/._443.bmp
- Supplementary files/457.bmp
- __MACOSX/Supplementary files/._457.bmp
- Supplementary files/480.bmp
- __MACOSX/Supplementary files/._480.bmp
- Supplementary files/494.bmp
- __MACOSX/Supplementary files/._494.bmp
- Supplementary files/495.bmp
- __MACOSX/Supplementary files/._495.bmp
- Supplementary files/481.bmp
- __MACOSX/Supplementary files/._481.bmp
- Supplementary files/456.bmp
- __MACOSX/Supplementary files/._456.bmp
- Supplementary files/442.bmp
- __MACOSX/Supplementary files/._442.bmp
- Supplementary files/454.bmp
- __MACOSX/Supplementary files/._454.bmp
- Supplementary files/440.bmp
- __MACOSX/Supplementary files/._440.bmp
- Supplementary files/468.bmp
- __MACOSX/Supplementary files/._468.bmp
- Supplementary files/497.bmp
- __MACOSX/Supplementary files/._497.bmp
- Supplementary files/483.bmp
- __MACOSX/Supplementary files/._483.bmp
- Supplementary files/482.bmp
- __MACOSX/Supplementary files/._482.bmp
- Supplementary files/496.bmp
- __MACOSX/Supplementary files/._496.bmp
- Supplementary files/469.bmp
- __MACOSX/Supplementary files/._469.bmp
- Supplementary files/441.bmp
- __MACOSX/Supplementary files/._441.bmp
- Supplementary files/455.bmp
- __MACOSX/Supplementary files/._455.bmp
- Supplementary files/479.bmp
- __MACOSX/Supplementary files/._479.bmp
- Supplementary files/451.bmp
- __MACOSX/Supplementary files/._451.bmp
- Supplementary files/445.bmp
- __MACOSX/Supplementary files/._445.bmp
- Supplementary files/492.bmp
- __MACOSX/Supplementary files/._492.bmp
- Supplementary files/486.bmp
- __MACOSX/Supplementary files/._486.bmp
- Supplementary files/487.bmp
- __MACOSX/Supplementary files/._487.bmp
- Supplementary files/493.bmp
- __MACOSX/Supplementary files/._493.bmp
- Supplementary files/444.bmp
- __MACOSX/Supplementary files/._444.bmp
- Supplementary files/450.bmp
- __MACOSX/Supplementary files/._450.bmp
- Supplementary files/478.bmp
- __MACOSX/Supplementary files/._478.bmp
- Supplementary files/446.bmp
- __MACOSX/Supplementary files/._446.bmp
- Supplementary files/452.bmp
- __MACOSX/Supplementary files/._452.bmp
- Supplementary files/485.bmp
- __MACOSX/Supplementary files/._485.bmp
- Supplementary files/491.bmp
- __MACOSX/Supplementary files/._491.bmp
- Supplementary files/490.bmp
- __MACOSX/Supplementary files/._490.bmp
- Supplementary files/484.bmp
- __MACOSX/Supplementary files/._484.bmp
- Supplementary files/453.bmp
- __MACOSX/Supplementary files/._453.bmp
- Supplementary files/447.bmp
- __MACOSX/Supplementary files/._447.bmp
- Supplementary files/420.bmp
- __MACOSX/Supplementary files/._420.bmp
- Supplementary files/434.bmp
- __MACOSX/Supplementary files/._434.bmp
- Supplementary files/408.bmp
- __MACOSX/Supplementary files/._408.bmp
- Supplementary files/409.bmp
- __MACOSX/Supplementary files/._409.bmp
- Supplementary files/435.bmp
- __MACOSX/Supplementary files/._435.bmp
- Supplementary files/421.bmp
- __MACOSX/Supplementary files/._421.bmp
- Supplementary files/437.bmp
- __MACOSX/Supplementary files/._437.bmp
- Supplementary files/423.bmp
- __MACOSX/Supplementary files/._423.bmp
- Supplementary files/422.bmp
- __MACOSX/Supplementary files/._422.bmp
- Supplementary files/436.bmp
- __MACOSX/Supplementary files/._436.bmp
- Supplementary files/432.bmp
- __MACOSX/Supplementary files/._432.bmp
- Supplementary files/426.bmp
- __MACOSX/Supplementary files/._426.bmp
- Supplementary files/427.bmp
- __MACOSX/Supplementary files/._427.bmp
- Supplementary files/433.bmp
- __MACOSX/Supplementary files/._433.bmp
- Supplementary files/419.bmp
- __MACOSX/Supplementary files/._419.bmp
- Supplementary files/425.bmp
- __MACOSX/Supplementary files/._425.bmp
- Supplementary files/431.bmp
- __MACOSX/Supplementary files/._431.bmp
- Supplementary files/430.bmp
- __MACOSX/Supplementary files/._430.bmp
- Supplementary files/424.bmp
- __MACOSX/Supplementary files/._424.bmp
- Supplementary files/418.bmp
- __MACOSX/Supplementary files/._418.bmp
- Supplementary files/401.bmp
- __MACOSX/Supplementary files/._401.bmp
- Supplementary files/415.bmp
- __MACOSX/Supplementary files/._415.bmp
- Supplementary files/429.bmp
- __MACOSX/Supplementary files/._429.bmp
- Supplementary files/428.bmp
- __MACOSX/Supplementary files/._428.bmp
- Supplementary files/414.bmp
- __MACOSX/Supplementary files/._414.bmp
- Supplementary files/400.bmp
- __MACOSX/Supplementary files/._400.bmp
- Supplementary files/416.bmp
- __MACOSX/Supplementary files/._416.bmp
- Supplementary files/402.bmp
- __MACOSX/Supplementary files/._402.bmp
- Supplementary files/403.bmp
- __MACOSX/Supplementary files/._403.bmp
- Supplementary files/417.bmp
- __MACOSX/Supplementary files/._417.bmp
- Supplementary files/413.bmp
- __MACOSX/Supplementary files/._413.bmp
- Supplementary files/407.bmp
- __MACOSX/Supplementary files/._407.bmp
- Supplementary files/406.bmp
- __MACOSX/Supplementary files/._406.bmp
- Supplementary files/412.bmp
- __MACOSX/Supplementary files/._412.bmp
- Supplementary files/438.bmp
- __MACOSX/Supplementary files/._438.bmp
- Supplementary files/404.bmp
- __MACOSX/Supplementary files/._404.bmp
- Supplementary files/410.bmp
- __MACOSX/Supplementary files/._410.bmp
- Supplementary files/411.bmp
- __MACOSX/Supplementary files/._411.bmp
- Supplementary files/405.bmp
- __MACOSX/Supplementary files/._405.bmp
- Supplementary files/439.bmp
- __MACOSX/Supplementary files/._439.bmp
- Supplementary files/462.bmp
- __MACOSX/Supplementary files/._462.bmp
- Supplementary files/476.bmp
- __MACOSX/Supplementary files/._476.bmp
- Supplementary files/489.bmp
- __MACOSX/Supplementary files/._489.bmp
- Supplementary files/488.bmp
- __MACOSX/Supplementary files/._488.bmp
- Supplementary files/477.bmp
- __MACOSX/Supplementary files/._477.bmp
- Supplementary files/463.bmp
- __MACOSX/Supplementary files/._463.bmp
- Supplementary files/475.bmp
- __MACOSX/Supplementary files/._475.bmp
- Supplementary files/461.bmp
- __MACOSX/Supplementary files/._461.bmp
- Supplementary files/449.bmp
- __MACOSX/Supplementary files/._449.bmp
- Supplementary files/448.bmp
- __MACOSX/Supplementary files/._448.bmp
- Supplementary files/460.bmp
- __MACOSX/Supplementary files/._460.bmp
- Supplementary files/474.bmp
- __MACOSX/Supplementary files/._474.bmp
- Supplementary files/458.bmp
- __MACOSX/Supplementary files/._458.bmp
- Supplementary files/470.bmp
- __MACOSX/Supplementary files/._470.bmp
- Supplementary files/464.bmp
- __MACOSX/Supplementary files/._464.bmp
- Supplementary files/465.bmp
- __MACOSX/Supplementary files/._465.bmp
- Supplementary files/471.bmp
- __MACOSX/Supplementary files/._471.bmp
- Supplementary files/459.bmp
- __MACOSX/Supplementary files/._459.bmp
- Supplementary files/467.bmp
- __MACOSX/Supplementary files/._467.bmp
- Supplementary files/473.bmp
- __MACOSX/Supplementary files/._473.bmp
- Supplementary files/498.bmp
- __MACOSX/Supplementary files/._498.bmp
- Supplementary files/499.bmp
- __MACOSX/Supplementary files/._499.bmp
- Supplementary files/472.bmp
- __MACOSX/Supplementary files/._472.bmp
- Supplementary files/466.bmp
- __MACOSX/Supplementary files/._466.bmp
