# Supplementary figures and images for: Infrared Fast-Maneuvering Target Tracking Based on Robust Exact Differentiator with Improved Particle Filter
Source: Hindawi journal article supplement (doi:10.1155/2022/6406672), 2022-10-21

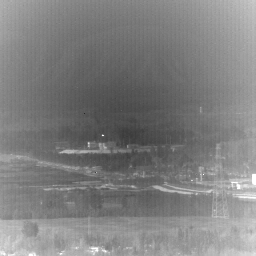

Supplement: f1 [file 6406672.f1.zip › Supplementary files/443.bmp]

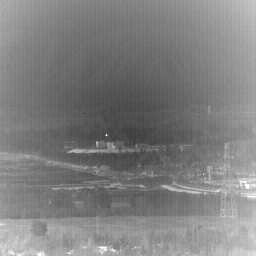

Supplement: f1 [file 6406672.f1.zip › Supplementary files/457.bmp]

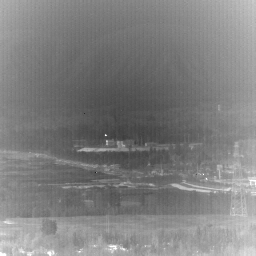

Supplement: f1 [file 6406672.f1.zip › Supplementary files/480.bmp]

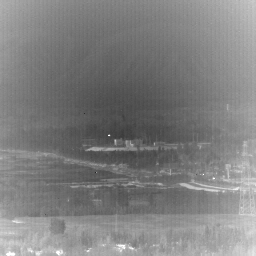

Supplement: f1 [file 6406672.f1.zip › Supplementary files/494.bmp]

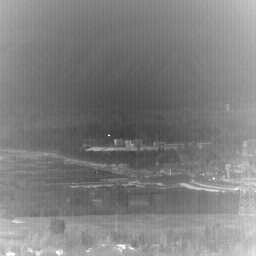

Supplement: f1 [file 6406672.f1.zip › Supplementary files/495.bmp]

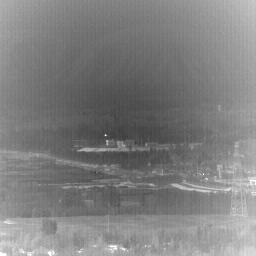

Supplement: f1 [file 6406672.f1.zip › Supplementary files/481.bmp]

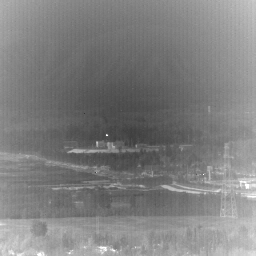

Supplement: f1 [file 6406672.f1.zip › Supplementary files/456.bmp]

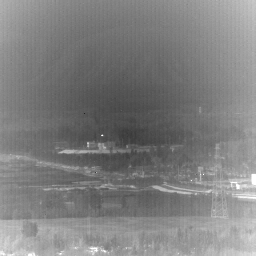

Supplement: f1 [file 6406672.f1.zip › Supplementary files/442.bmp]

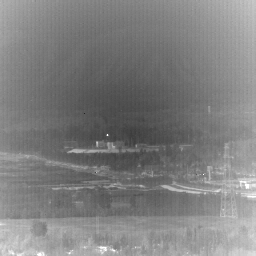

Supplement: f1 [file 6406672.f1.zip › Supplementary files/454.bmp]

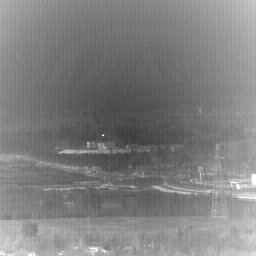

Supplement: f1 [file 6406672.f1.zip › Supplementary files/440.bmp]

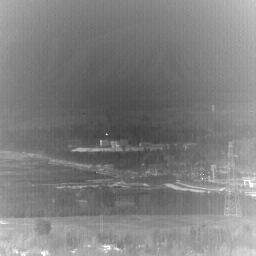

Supplement: f1 [file 6406672.f1.zip › Supplementary files/468.bmp]

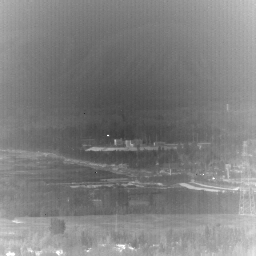

Supplement: f1 [file 6406672.f1.zip › Supplementary files/497.bmp]

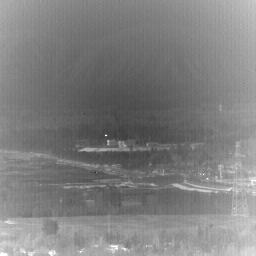

Supplement: f1 [file 6406672.f1.zip › Supplementary files/483.bmp]

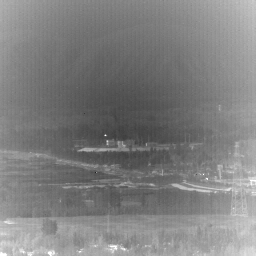

Supplement: f1 [file 6406672.f1.zip › Supplementary files/482.bmp]

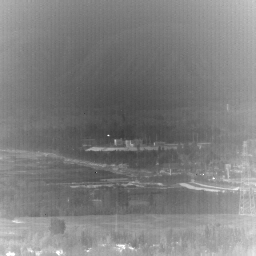

Supplement: f1 [file 6406672.f1.zip › Supplementary files/496.bmp]

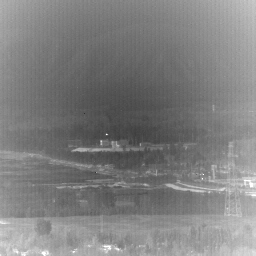

Supplement: f1 [file 6406672.f1.zip › Supplementary files/469.bmp]

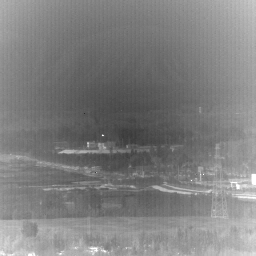

Supplement: f1 [file 6406672.f1.zip › Supplementary files/441.bmp]

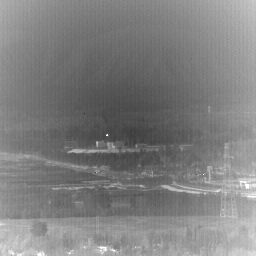

Supplement: f1 [file 6406672.f1.zip › Supplementary files/455.bmp]

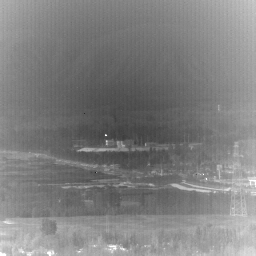

Supplement: f1 [file 6406672.f1.zip › Supplementary files/479.bmp]

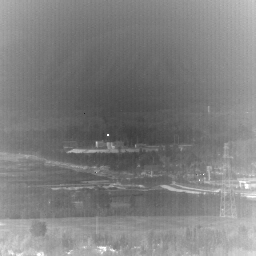

Supplement: f1 [file 6406672.f1.zip › Supplementary files/451.bmp]

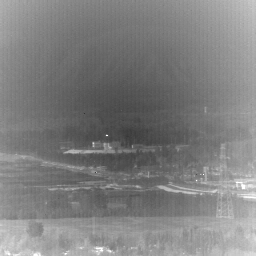

Supplement: f1 [file 6406672.f1.zip › Supplementary files/445.bmp]

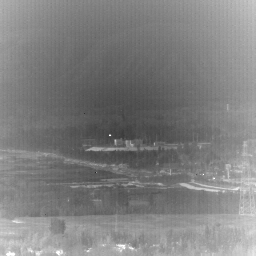

Supplement: f1 [file 6406672.f1.zip › Supplementary files/492.bmp]

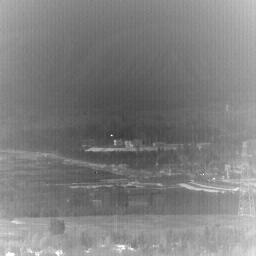

Supplement: f1 [file 6406672.f1.zip › Supplementary files/486.bmp]

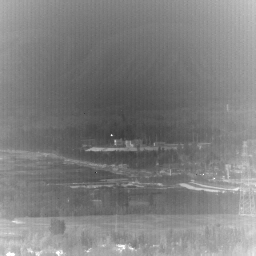

Supplement: f1 [file 6406672.f1.zip › Supplementary files/487.bmp]

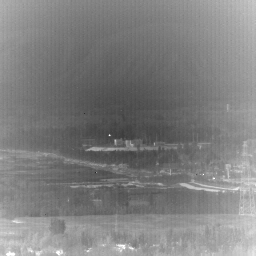

Supplement: f1 [file 6406672.f1.zip › Supplementary files/493.bmp]

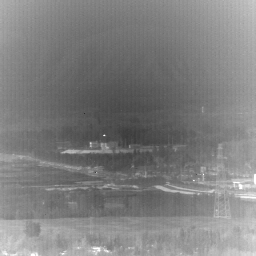

Supplement: f1 [file 6406672.f1.zip › Supplementary files/444.bmp]

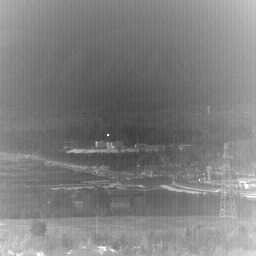

Supplement: f1 [file 6406672.f1.zip › Supplementary files/450.bmp]

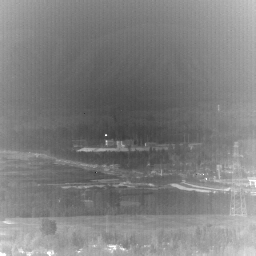

Supplement: f1 [file 6406672.f1.zip › Supplementary files/478.bmp]

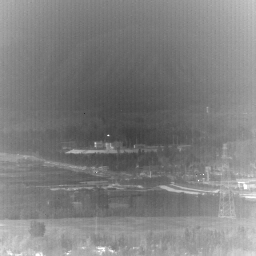

Supplement: f1 [file 6406672.f1.zip › Supplementary files/446.bmp]

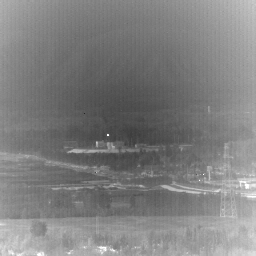

Supplement: f1 [file 6406672.f1.zip › Supplementary files/452.bmp]

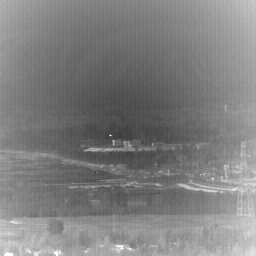

Supplement: f1 [file 6406672.f1.zip › Supplementary files/485.bmp]

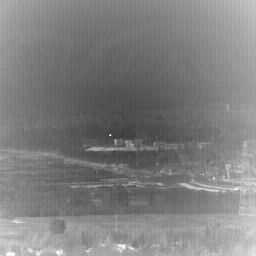

Supplement: f1 [file 6406672.f1.zip › Supplementary files/491.bmp]

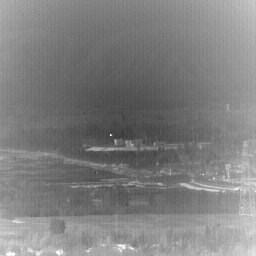

Supplement: f1 [file 6406672.f1.zip › Supplementary files/490.bmp]

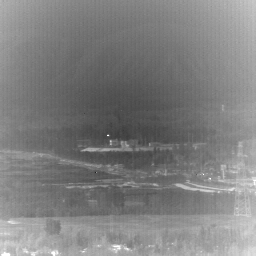

Supplement: f1 [file 6406672.f1.zip › Supplementary files/484.bmp]

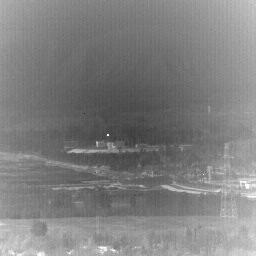

Supplement: f1 [file 6406672.f1.zip › Supplementary files/453.bmp]

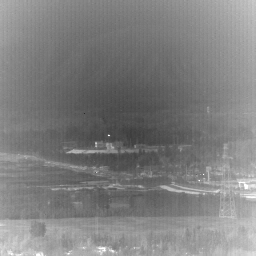

Supplement: f1 [file 6406672.f1.zip › Supplementary files/447.bmp]

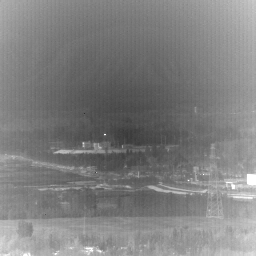

Supplement: f1 [file 6406672.f1.zip › Supplementary files/420.bmp]

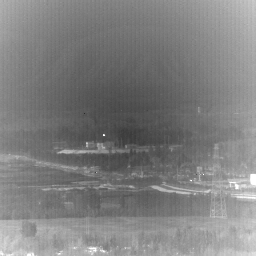

Supplement: f1 [file 6406672.f1.zip › Supplementary files/434.bmp]

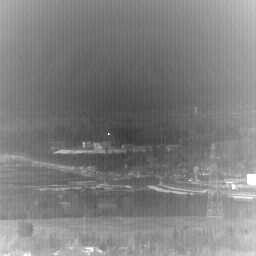

Supplement: f1 [file 6406672.f1.zip › Supplementary files/408.bmp]

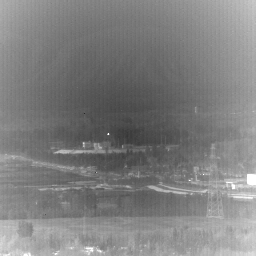

Supplement: f1 [file 6406672.f1.zip › Supplementary files/409.bmp]

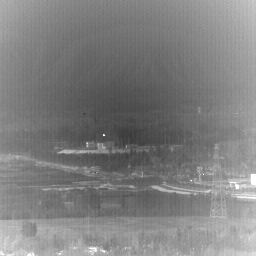

Supplement: f1 [file 6406672.f1.zip › Supplementary files/435.bmp]

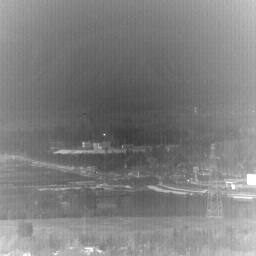

Supplement: f1 [file 6406672.f1.zip › Supplementary files/421.bmp]

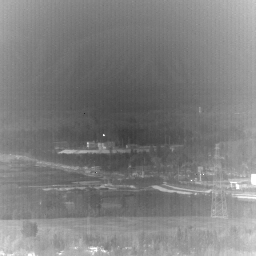

Supplement: f1 [file 6406672.f1.zip › Supplementary files/437.bmp]

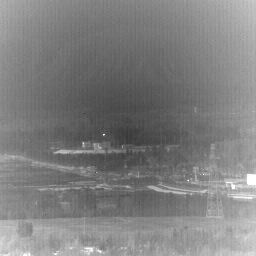

Supplement: f1 [file 6406672.f1.zip › Supplementary files/423.bmp]

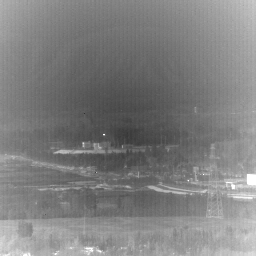

Supplement: f1 [file 6406672.f1.zip › Supplementary files/422.bmp]

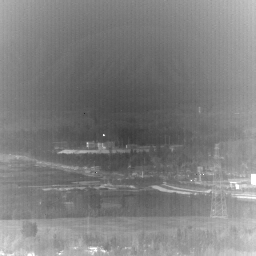

Supplement: f1 [file 6406672.f1.zip › Supplementary files/436.bmp]

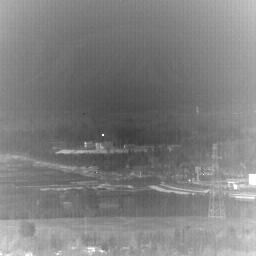

Supplement: f1 [file 6406672.f1.zip › Supplementary files/432.bmp]

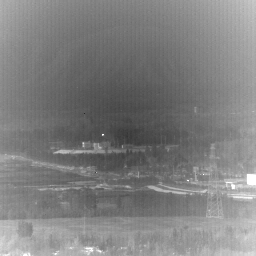

Supplement: f1 [file 6406672.f1.zip › Supplementary files/426.bmp]

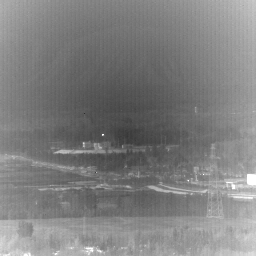

Supplement: f1 [file 6406672.f1.zip › Supplementary files/427.bmp]

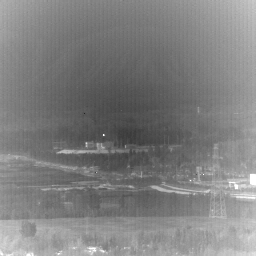

Supplement: f1 [file 6406672.f1.zip › Supplementary files/433.bmp]

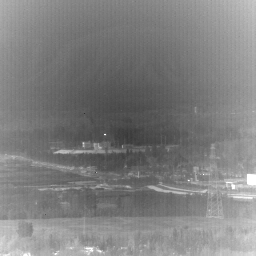

Supplement: f1 [file 6406672.f1.zip › Supplementary files/419.bmp]

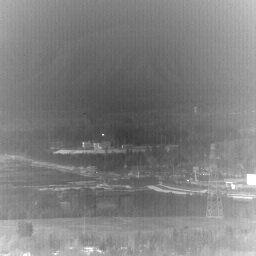

Supplement: f1 [file 6406672.f1.zip › Supplementary files/425.bmp]

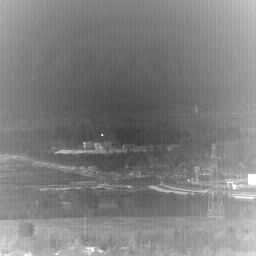

Supplement: f1 [file 6406672.f1.zip › Supplementary files/431.bmp]

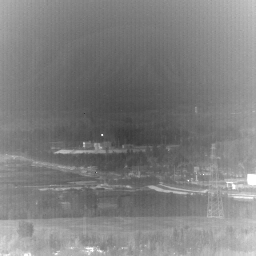

Supplement: f1 [file 6406672.f1.zip › Supplementary files/430.bmp]

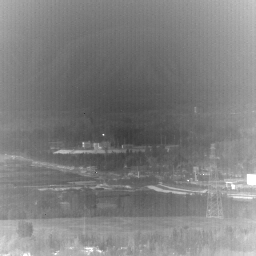

Supplement: f1 [file 6406672.f1.zip › Supplementary files/424.bmp]

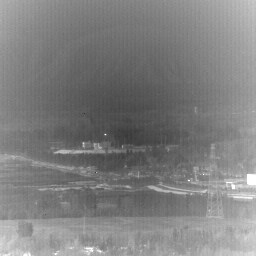

Supplement: f1 [file 6406672.f1.zip › Supplementary files/418.bmp]

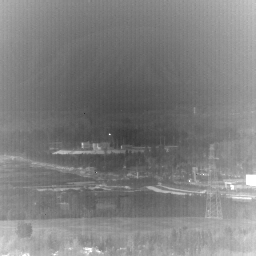

Supplement: f1 [file 6406672.f1.zip › Supplementary files/401.bmp]

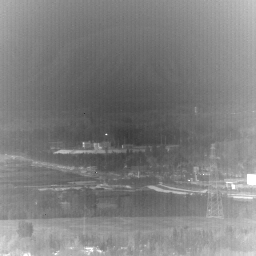

Supplement: f1 [file 6406672.f1.zip › Supplementary files/415.bmp]

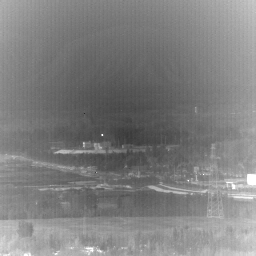

Supplement: f1 [file 6406672.f1.zip › Supplementary files/429.bmp]

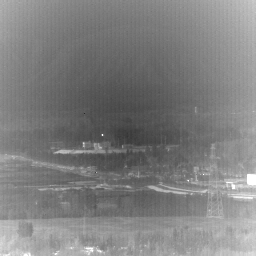

Supplement: f1 [file 6406672.f1.zip › Supplementary files/428.bmp]

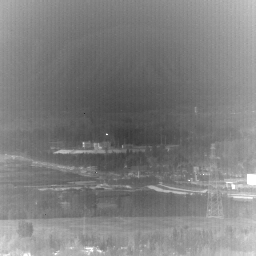

Supplement: f1 [file 6406672.f1.zip › Supplementary files/414.bmp]

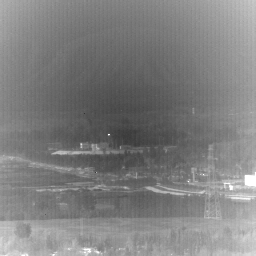

Supplement: f1 [file 6406672.f1.zip › Supplementary files/400.bmp]

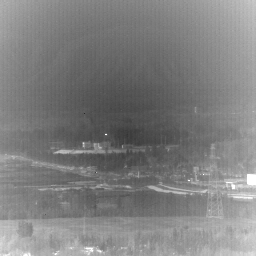

Supplement: f1 [file 6406672.f1.zip › Supplementary files/416.bmp]

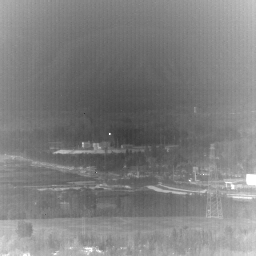

Supplement: f1 [file 6406672.f1.zip › Supplementary files/402.bmp]

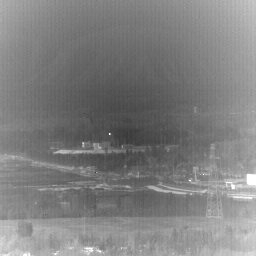

Supplement: f1 [file 6406672.f1.zip › Supplementary files/403.bmp]

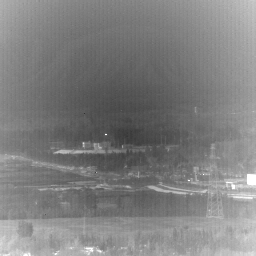

Supplement: f1 [file 6406672.f1.zip › Supplementary files/417.bmp]

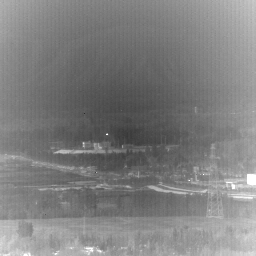

Supplement: f1 [file 6406672.f1.zip › Supplementary files/413.bmp]

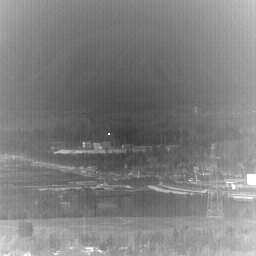

Supplement: f1 [file 6406672.f1.zip › Supplementary files/407.bmp]

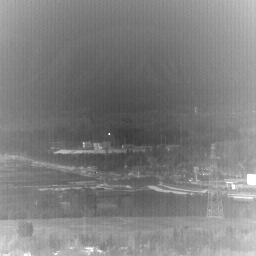

Supplement: f1 [file 6406672.f1.zip › Supplementary files/406.bmp]

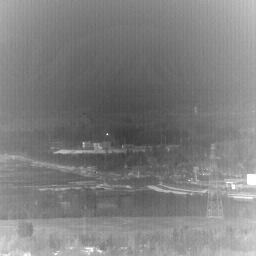

Supplement: f1 [file 6406672.f1.zip › Supplementary files/412.bmp]

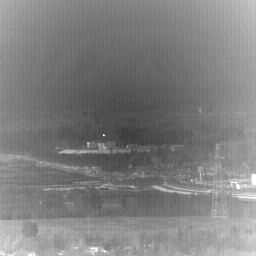

Supplement: f1 [file 6406672.f1.zip › Supplementary files/438.bmp]

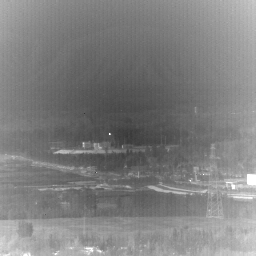

Supplement: f1 [file 6406672.f1.zip › Supplementary files/404.bmp]

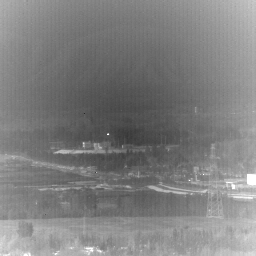

Supplement: f1 [file 6406672.f1.zip › Supplementary files/410.bmp]

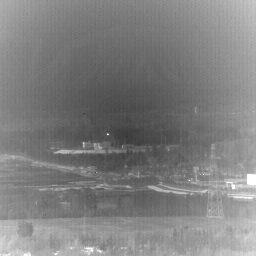

Supplement: f1 [file 6406672.f1.zip › Supplementary files/411.bmp]

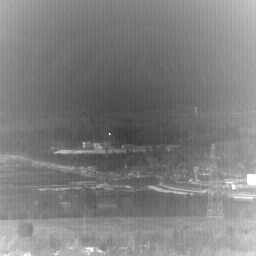

Supplement: f1 [file 6406672.f1.zip › Supplementary files/405.bmp]

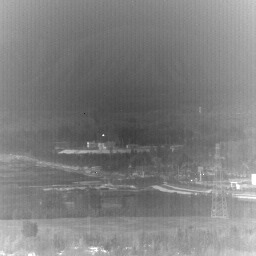

Supplement: f1 [file 6406672.f1.zip › Supplementary files/439.bmp]

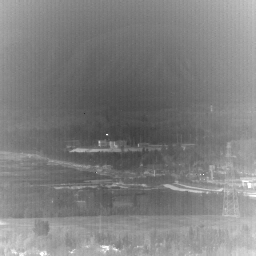

Supplement: f1 [file 6406672.f1.zip › Supplementary files/462.bmp]

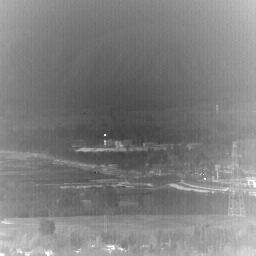

Supplement: f1 [file 6406672.f1.zip › Supplementary files/476.bmp]

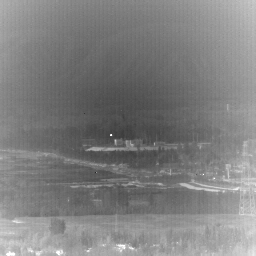

Supplement: f1 [file 6406672.f1.zip › Supplementary files/489.bmp]

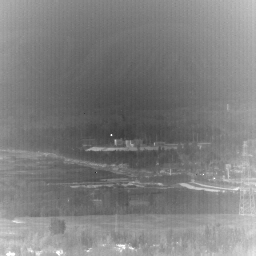

Supplement: f1 [file 6406672.f1.zip › Supplementary files/488.bmp]

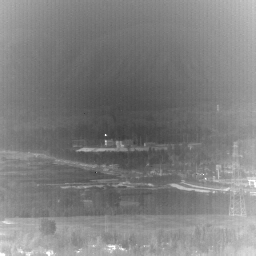

Supplement: f1 [file 6406672.f1.zip › Supplementary files/477.bmp]

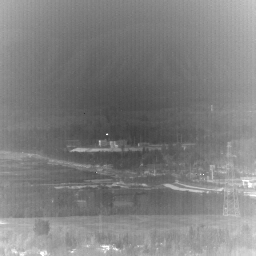

Supplement: f1 [file 6406672.f1.zip › Supplementary files/463.bmp]

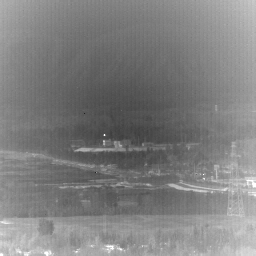

Supplement: f1 [file 6406672.f1.zip › Supplementary files/475.bmp]

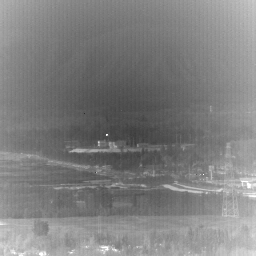

Supplement: f1 [file 6406672.f1.zip › Supplementary files/461.bmp]

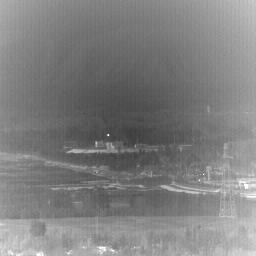

Supplement: f1 [file 6406672.f1.zip › Supplementary files/449.bmp]

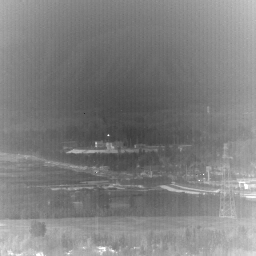

Supplement: f1 [file 6406672.f1.zip › Supplementary files/448.bmp]

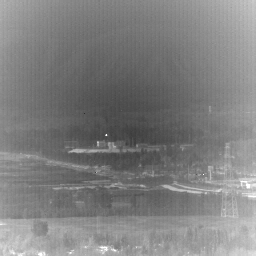

Supplement: f1 [file 6406672.f1.zip › Supplementary files/460.bmp]

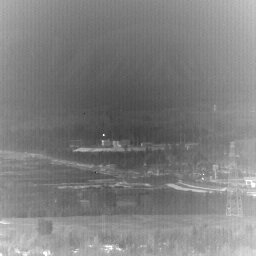

Supplement: f1 [file 6406672.f1.zip › Supplementary files/474.bmp]

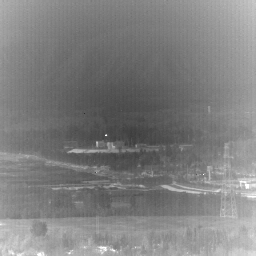

Supplement: f1 [file 6406672.f1.zip › Supplementary files/458.bmp]

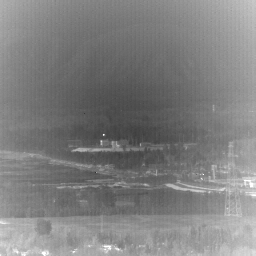

Supplement: f1 [file 6406672.f1.zip › Supplementary files/470.bmp]

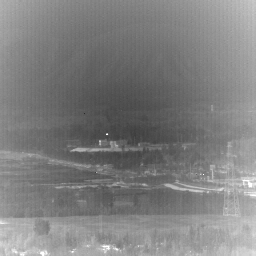

Supplement: f1 [file 6406672.f1.zip › Supplementary files/464.bmp]

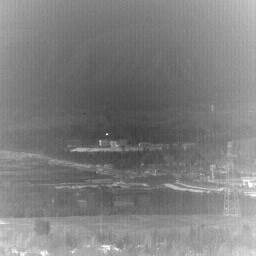

Supplement: f1 [file 6406672.f1.zip › Supplementary files/465.bmp]

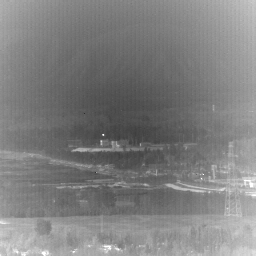

Supplement: f1 [file 6406672.f1.zip › Supplementary files/471.bmp]

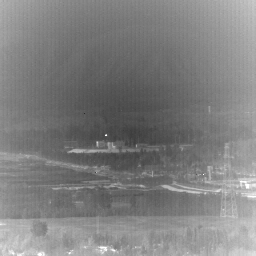

Supplement: f1 [file 6406672.f1.zip › Supplementary files/459.bmp]

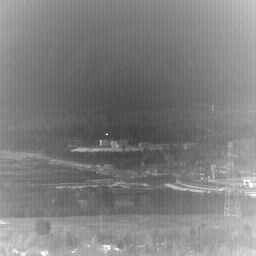

Supplement: f1 [file 6406672.f1.zip › Supplementary files/467.bmp]

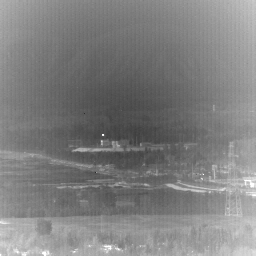

Supplement: f1 [file 6406672.f1.zip › Supplementary files/473.bmp]

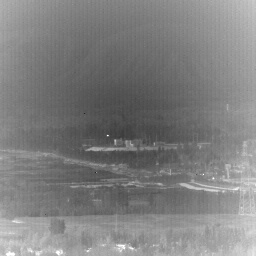

Supplement: f1 [file 6406672.f1.zip › Supplementary files/498.bmp]

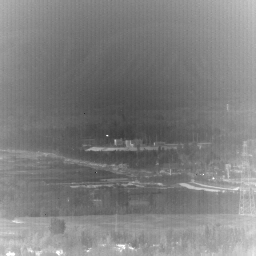

Supplement: f1 [file 6406672.f1.zip › Supplementary files/499.bmp]

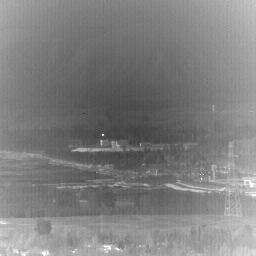

Supplement: f1 [file 6406672.f1.zip › Supplementary files/472.bmp]

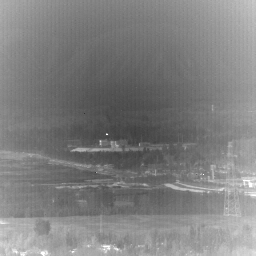

Supplement: f1 [file 6406672.f1.zip › Supplementary files/466.bmp]
